# Supplementary material
Source: publisher site journal article supplement (https://www.dovepress.com/article/449071)
Supplement: Supplementary file 1 [file get_supplementary_file.php]

**Table S1**. The primary data of diastolic and systolic blood pressure and resting heart rate in patients with chronic diseases.

| Resting heart rate | Systolic blood pressure | Diastolic blood pressure | Patient groups | Patient ID |
| --- | --- | --- | --- | --- |
| 70 | 126 | 69 | HT | 1 |
| 52 | 125 | 80 | HT | 2 |
| 63 | 120 | 80 | HT | 3 |
| 92 | 157 | 90 | HT | 4 |
| 80 | 125 | 80 | HT | 5 |
| 98 | 125 | 80 | HT | 6 |
| 80 | 123 | 90 | HT | 7 |
| 73 | 141 | 81 | HT | 8 |
| 77 | 164 | 100 | HT | 9 |
| 72 | 125 | 80 | HT | 10 |
| 79 | 170 | 79 | HT | 11 |
| 86 | 152 | 90 | HT | 12 |
| 50 | 152 | 90 | HT | 13 |
| 79 | 125 | 90 | HT | 14 |
| 80 | 125 | 90 | HT | 15 |
| 90 | 125 | 90 | HT | 16 |
| 66 | 164 | 90 | HT | 17 |
| 95 | 130 | 80 | HT | 18 |
| 82 | 125 | 80 | HT | 19 |
| 89 | 152 | 80 | HT | 20 |
| 80 | 123 | 90 | DL | 21 |
| 69 | 125 | 80 | DL | 22 |
| 77 | 125 | 100 | DL | 23 |
| 81 | 120 | 80 | DL | 24 |
| 86 | 125 | 90 | DL | 25 |
| 71 | 125 | 80 | DL | 26 |
| 92 | 125 | 80 | DL | 27 |
| 66 | 125 | 80 | DL | 28 |
| 82 | 130 | 80 | DL | 29 |
| 89 | 125 | 80 | DL | 30 |
| 64 | 120 | 80 | D | 31 |
| 80 | 125 | 80 | D | 32 |
| 98 | 125 | 80 | D | 33 |
| 79 | 125 | 80 | D | 34 |
| 86 | 125 | 90 | D | 35 |
| 50 | 125 | 80 | D | 36 |
| 90 | 152 | 80 | D | 37 |
| 66 | 125 | 80 | D | 38 |
| 95 | 130 | 80 | D | 39 |
| 82 | 125 | 80 | D | 40 |
| 89 | 125 | 80 | D | 41 |

HT=Hypertension, DL=Dyslipidemia, D=Diabetic.

**Table S2**. The primary data of oxygen saturation at rest (before exercise) and after exercise, and heart rate during whole period

in patients with chronic diseases.

| Heart rate of criterion (Polar chest strap) for all chronic patients | Heart rate practical (Apple Watch) for all chronic patients | Oxygen saturation after exercise of criterion (Contec) for all chronic patients | Oxygen saturation after exercise practical (Apple Watch) for all chronic patients | Oxygen saturation at rest (before exercise) of criterion (Contec) ) for all chronic patients | Oxygen saturation at rest (before exercise) practical (Apple Watch) for all chronic patients | Patient group | Patient ID |
| --- | --- | --- | --- | --- | --- | --- | --- |
| 106.27 | 105.58 | 95.50 | 93.60 | 97.00 | 97.60 | HT | 1 |
| 66.77 | 66.77 | 96.80 | 97.20 | 97.40 | 98.60 | HT | 2 |
| 105.02 | 105.08 | 94.00 | 95.20 | 94.40 | 96.00 | HT | 3 |
| 115.19 | 115.45 | 95.20 | 95.40 | 97.20 | 97.20 | HT | 4 |
| 107.97 | 108.08 | 97.60 | 97.80 | 96.00 | 96.20 | HT | 5 |
| 117.12 | 116.97 | 97.00 | 98.00 | 97.40 | 97.00 | HT | 6 |
| 112.02 | 112.16 | 96.60 | 97.40 | 96.20 | 96.80 | HT | 7 |
| 100.60 | 100.39 | 95.80 | 95.40 | 98.20 | 98.20 | HT | 8 |
| 96.77 | 96.60 | 98.80 | 99.20 | 98.60 | 99.20 | HT | 9 |
| 88.02 | 87.87 | 97.00 | 99.00 | 96.40 | 96.60 | HT | 10 |
| 100.62 | 100.66 | 97.40 | 97.40 | 97.00 | 97.00 | HT | 11 |
| 109.95 | 110.00 | 97.00 | 97.20 | 97.20 | 98.20 | HT | 12 |
| 90.12 | 90.00 | 97.40 | 97.40 | 96.60 | 96.60 | HT | 13 |
| 105.20 | 105.39 | 97.20 | 97.60 | 97.20 | 97.20 | HT | 14 |
| 101.75 | 101.77 | 96.40 | 96.00 | 97.00 | 96.80 | HT | 15 |
| 108.75 | 108.89 | 97.40 | 97.60 | 96.60 | 96.60 | HT | 16 |
| 92.75 | 92.68 | 97.40 | 97.20 | 96.40 | 96.40 | HT | 17 |
| 115.79 | 115.87 | 97.00 | 97.00 | 96.20 | 96.20 | HT | 18 |
| 104.14 | 104.06 | 95.80 | 95.80 | 96.80 | 97.00 | HT | 19 |
| 102.10 | 102.10 | 95.80 | 95.80 | 94.40 | 94.40 | HT | 20 |
| 102.02 | 102.16 | 96.60 | 97.40 | 96.20 | 96.80 | DL | 21 |
| 117.47 | 117.72 | 97.00 | 98.20 | 98.00 | 98.20 | DL | 22 |
| 96.77 | 96.60 | 98.80 | 99.20 | 98.60 | 99.20 | DL | 23 |
| 104.68 | 104.70 | 97.00 | 97.00 | 96.00 | 96.00 | DL | 24 |
| 109.68 | 110.00 | 97.00 | 97.20 | 97.20 | 98.20 | DL | 25 |
| 104.20 | 104.18 | 98.00 | 98.80 | 97.20 | 97.20 | DL | 26 |
| 104.54 | 104.56 | 94.20 | 94.00 | 95.40 | 95.40 | DL | 27 |
| 92.75 | 92.68 | 97.40 | 97.20 | 96.40 | 96.40 | DL | 28 |
| 104.14 | 104.06 | 95.80 | 95.80 | 96.80 | 97.00 | DL | 29 |
| 102.10 | 102.10 | 95.80 | 95.80 | 94.40 | 94.40 | DL | 30 |
| 86.41 | 86.41 | 97.20 | 97.20 | 96.00 | 96.60 | D | 31 |
| 107.97 | 108.08 | 97.60 | 97.80 | 96.00 | 96.20 | D | 32 |
| 117.21 | 116.97 | 97.00 | 98.00 | 97.00 | 97.40 | D | 33 |
| 104.77 | 104.29 | 96.20 | 96.20 | 95.80 | 95.80 | D | 34 |
| 109.95 | 110.00 | 97.00 | 97.20 | 97.20 | 98.20 | D | 35 |
| 90.12 | 90.00 | 97.40 | 97.40 | 96.60 | 96.60 | D | 36 |
| 108.75 | 108.89 | 97.40 | 97.60 | 96.60 | 96.60 | D | 37 |
| 92.75 | 92.68 | 97.40 | 97.20 | 96.40 | 96.40 | D | 38 |
| 115.79 | 115.87 | 97.00 | 97.00 | 96.20 | 96.20 | D | 39 |
| 104.14 | 104.06 | 95.80 | 95.80 | 96.80 | 97.00 | D | 40 |
| 102.10 | 102.10 | 95.80 | 95.80 | 94.40 | 94.40 | D | 41 |

HT=Hypertension1, DL=Dyslipidemia, D=Diabetic.
